# Supplementary material for: Adherence to COVID-19 Prevention Measures in the Democratic Republic of the Congo, Results of Two Consecutive Online Surveys
Source: MDPI journal article supplement (doi:10.3390/ijerph18052525), 2021-03-04
Supplement: s1 [file s1]

# RDC Covid-19 Questionnaire

## Socio-demographic information

Q: Age (\*)

Type: number

A: number (min: 1 / max: 110 / step: 1)

Q: Sex (\*)

Type: choice

A: one of the following:

|        |    |               |
|--------|----|---------------|
| male   | => | <i>Male</i>   |
| female | => | <i>Female</i> |

Q: Nationality (\*)

Type: choice

A: one of the following:

|           |    |                  |
|-----------|----|------------------|
| local     | => | <i>Congolese</i> |
| foreigner | => | <i>Foreigner</i> |

Q: In which province of Congo do you live? (\*)

Type: choice

A: one of the following:

|                |    |                       |
|----------------|----|-----------------------|
| bas_uele       | => | <i>Bas-Uele</i>       |
| equateur       | => | <i>Équateur</i>       |
| haut_katanga   | => | <i>Haut-Katanga</i>   |
| haut_lomami    | => | <i>Haut-Lomami</i>    |
| haut-uele      | => | <i>Haut-Uele</i>      |
| ituri          | => | <i>Ituri</i>          |
| kasai          | => | <i>Kasai</i>          |
| kasai_central  | => | <i>Kasai-Central</i>  |
| kasai_oriental | => | <i>Kasai-Oriental</i> |
| kinshasa       | => | <i>Kinshasa</i>       |
| kongo_central  | => | <i>Kongo-Central</i>  |
| kwango         | => | <i>Kwango</i>         |
| kwilu          | => | <i>Kwilu</i>          |
| lomami         | => | <i>Lomami</i>         |
| lualaba        | => | <i>Lualaba</i>        |
| mai_ndombe     | => | <i>Mai-Ndombe</i>     |
| maniema        | => | <i>Maniema</i>        |
| mongala        | => | <i>Mongala</i>        |
| nord_kivu      | => | <i>Nord-Kivu</i>      |

|             |    |                    |
|-------------|----|--------------------|
| nord_ubangi | => | <i>Nord-Ubangi</i> |
| sankuru     | => | <i>Sankuru</i>     |
| sud_kivu    | => | <i>Sud-Kivu</i>    |
| sud_ubangi  | => | <i>Sud-Ubangi</i>  |
| tanganyika  | => | <i>Tanganyika</i>  |
| tshopo      | => | <i>Tshopo</i>      |
| tshuapa     | => | <i>Tshuapa</i>     |

**Q: Religion (\*)**

Type: choice

A: one of the following:

|                 |    |                              |
|-----------------|----|------------------------------|
| protestant      | => | <i>Protestant</i>            |
| catholic        | => | <i>Catholic</i>              |
| pentecostal     | => | <i>Pentecostal</i>           |
| adventist       | => | <i>Seventh Day Adventist</i> |
| muslim          | => | <i>Muslim</i>                |
| jehovah_witness | => | <i>Jehovah Witness</i>       |
| other           | => | <i>Other</i>                 |
| none            | => | <i>None</i>                  |

**Q: Highest educational level (\*)**

Type: choice

A: one of the following:

|                                        |    |                                               |
|----------------------------------------|----|-----------------------------------------------|
| primary                                | => | <i>Primary</i>                                |
| Secondary                              | => | <i>Secondary</i>                              |
| University Undergraduate degree holder | => | <i>University Undergraduate degree holder</i> |
| University Postgraduate degree holder  | => | <i>University Postgraduate degree holder</i>  |

**Q: Marital status (\*)**

Type: choice

A: one of the following:

|                 |    |                        |
|-----------------|----|------------------------|
| single          | => | <i>Single</i>          |
| legally_married | => | <i>Legally married</i> |
| cohabitation    | => | <i>Cohabitation</i>    |
| divorced        | => | <i>Divorced</i>        |
| widow_widower   | => | <i>Widow/widower</i>   |

**Q: Who do you currently live with? (many answers possible) (\*)**

Type: choice\_multiple

A: multiple answers possible:

|                                    |    |                                           |
|------------------------------------|----|-------------------------------------------|
| My parent(s)                       | => | <i>My parent(s)</i>                       |
| My spouse/partner                  | => | <i>My spouse/partner</i>                  |
| My child(ren)                      | => | <i>My child(ren)</i>                      |
| My sibling(s) or other relative(s) | => | <i>My sibling(s) or other relative(s)</i> |
| Friends                            | => | <i>Friends</i>                            |
| I live alone                       | => | <i>I live alone</i>                       |

How many housemates do you have (yourself not included)? Please write the number of persons corresponding to each age group. Write 0 if there is nobody in a given age group.

**Q: Adults over 70 years of age: (\*)**

Type: number

A: number (min: n/a / max: 10 / step: n/a)

**Q: Adults between 18 and 70 years: (\*)**

Type: number

A: number (min: n/a / max: 10 / step: n/a)

**Q: Children between 12 and 17 years: (\*)**

Type: number

A: number (min: n/a / max: 10 / step: n/a)

**Q: Children younger than 12 years: (\*)**

Type: number

A: number (min: n/a / max: 10 / step: n/a)

**Q: Do you live in: (\*)**

Type: choice

A: one of the following:

|            |    |                              |
|------------|----|------------------------------|
| rural_area | => | <i>a rural area/village?</i> |
| suburb     | => | <i>a suburban area?</i>      |
| urban_town | => | <i>an urban area/town</i>    |
| other      | => | <i>Other (specify)</i>       |

**Q: Specify urban area: (\*)**

Type: choice

A: one of the following:

|                    |    |                                      |
|--------------------|----|--------------------------------------|
| headquarter_region | => | <i>In a regional headquarter</i>     |
| capital_country    | => | <i>In the capital of the country</i> |
| economic_capital   | => | <i>In the economic capital</i>       |
| big_city           | => | <i>In another big city</i>           |

Visible if

|                 |                          |
|-----------------|--------------------------|
| Q:              | A:                       |
| Do you live in: | - value =><br>urban_town |

Q: Specify where you live: (\*)

Type: text

A: text input

Visible if

|                 |                     |
|-----------------|---------------------|
| Q:              | A:                  |
| Do you live in: | - value =><br>other |

Q: What are your housing conditions? (\*)

Type: choice

A: one of the following:

|           |    |                                                                     |
|-----------|----|---------------------------------------------------------------------|
| room      | => | <i>a room</i>                                                       |
| studio    | => | <i>a studio (a room, with kitchen and toilet)</i>                   |
| apartment | => | <i>an apartment with many other households in the same building</i> |
| villa     | => | <i>a villa</i>                                                      |
| hut       | => | <i>a hut</i>                                                        |
| homeless  | => | <i>homeless</i>                                                     |

Q: In the context of your country, what category is most appropriate for your current socio-economic situation? (\*)

Type: choice

A: one of the following:

|              |    |                                     |
|--------------|----|-------------------------------------|
| low_income   | => | <i>Low income category</i>          |
| low_middle   | => | <i>Lower middle income category</i> |
| upper_middle | => | <i>Upper middle income category</i> |
| high_income  | => | <i>High income category</i>         |

## Daily life during the coronavirus epidemic

Q: How do you obtain information about the coronavirus epidemic? (many answers possible) (\*)

Type: choice\_multiple

A: multiple answers possible:

|                   |    |                                                                 |
|-------------------|----|-----------------------------------------------------------------|
| family_neighbours | => | <i>From family, neighbours or friends</i>                       |
| radio             | => | <i>From the radio</i>                                           |
| television        | => | <i>From the television</i>                                      |
| social_media      | => | <i>From the social media (WhatsApp, Facebook, Twitter, etc)</i> |
| government        | => | <i>From government authorities</i>                              |
| chief             | => | <i>From the village/quarter chief</i>                           |
| religious         | => | <i>From the religious authorities</i>                           |
| health_personnel  | => | <i>From healthcare workers (nurses, doctors, etc)</i>           |

Q: How many people apart from your housemates did you talk to yesterday face to face (not by phone, chat etc)?(\*)

Type: number

A: number (min: n/a / max: n/a / step: n/a)

Q: When was the last time you shook hands, hugged, gave a kiss or had any form of physical contact with someone other than a housemate, during the last month? (\*)

Type: choice

A: one of the following:

|                     |    |                                                                            |
|---------------------|----|----------------------------------------------------------------------------|
| today               | => | <i>Today</i>                                                               |
| last_two_days       | => | <i>Last two days</i>                                                       |
| last_3_to_6_days    | => | <i>Last 3 to 6 days</i>                                                    |
| one_to_two_weeks    | => | <i>Between one to two weeks ago</i>                                        |
| more_than_two_weeks | => | <i>More than two weeks ago</i>                                             |
| no_contacts         | => | <i>No contacts with persons outside my household during the last month</i> |

Q: During the last week did you have difficulties in obtaining food or essential needs??(\*)

Type: choice

A: one of the following:

|     |    |            |
|-----|----|------------|
| Yes | => | <i>Yes</i> |
| No  | => | <i>No</i>  |

Q: What was the most important reason you had difficulties in obtaining food last week? (\*)

Type: choice

A: one of the following:

|                       |    |                                                                             |
|-----------------------|----|-----------------------------------------------------------------------------|
| no_money              | => | <i>No money due to lost revenue since the coronavirus epidemic started</i>  |
| little_food_available | => | <i>Little food available in shops/market</i>                                |
| expensive             | => | <i>Food has become too expensive since the coronavirus epidemic started</i> |
| unsafe_to_go_out      | => | <i>I felt it was unsafe to go out to buy food</i>                           |
| to_ill_to_go_out      | => | <i>I was too ill to go out</i>                                              |

Visible if

Q:

A:

During the last week did you have difficulties in obtaining food or essential needs??

- value =>  
Yes

Q: During the last week, how worried or afraid were you about your health? (\*)

Type: choice\_scale

A: 1 = not worried to 5 = extremely worried

|   |    |   |
|---|----|---|
| 1 | => | 1 |
| 2 | => | 2 |
| 3 | => | 3 |
| 4 | => | 4 |
| 5 | => | 5 |

Q: Have you suffered any form of violence or discrimination because of the measures taken against the coronavirus? (many answers possible) (\*)

Type: choice\_multiple

A: multiple answers possible:

|                               |    |                                                            |
|-------------------------------|----|------------------------------------------------------------|
| home_violence                 | => | <i>Physical violence at home</i>                           |
| outside_violence              | => | <i>Physical violence outside</i>                           |
| socio_economic_discrimination | => | <i>Discrimination because of my social/economic status</i> |
| quarantined                   | => | <i>Discrimination because I was quarantined</i>            |
| ethnic_discrimination         | => | <i>Discrimination because of my ethnicity</i>              |
| no_violence_discrimination    | => | <i>No violence or discrimination</i>                       |

Q: During the COVID-19 lockdown, have you experienced violence from your sexual partner (if applicable)? (\*)

Type: choice

A: one of the following:

|                |    |                       |
|----------------|----|-----------------------|
| yes            | => | <i>Yes</i>            |
| no             | => | <i>No</i>             |
| not_applicable | => | <i>Not applicable</i> |

Q: If yes, which kind of violence did you experience? (\*)

Type: choice

A: one of the following:

|          |    |                                        |
|----------|----|----------------------------------------|
| verbal   | => | <i>Verbal violence</i>                 |
| physical | => | <i>Physical violence</i>               |
| sexual   | => | <i>Sexual violence, including rape</i> |
| other    | => | <i>Other</i>                           |

Visible if

Q:

A:

During the COVID-19 lockdown, have you experienced violence from your sexual partner (if applicable)?

- value =>  
yes

Q: How did you arrange the care of the kids in your home today? (\*)

Type: choice

A: one of the following:

|                       |    |                                             |
|-----------------------|----|---------------------------------------------|
| home_by_myself        | => | <i>At home, by myself</i>                   |
| home_housemates       | => | <i>At home, with my housemates</i>          |
| school_childcare      | => | <i>To school / childcare</i>                |
| friends_acquaintances | => | <i>At friends / acquaintances</i>           |
| aunts_uncles          | => | <i>At aunts or uncles</i>                   |
| grandparents          | => | <i>At grandparents</i>                      |
| home_house_help       | => | <i>At home, with a house help/nanny</i>     |
| other                 | => | <i>Other</i>                                |
| not_applicable        | => | <i>Not Applicable (no children at home)</i> |

## Professional life during the coronavirus epidemic

Q: What do you do for a living? (\*)

Type: choice

A: one of the following:

|               |    |                                                  |
|---------------|----|--------------------------------------------------|
| student       | => | <i>Student</i>                                   |
| jobless       | => | <i>Jobless</i>                                   |
| self_employed | => | <i>Self-employed</i>                             |
| company       | => | <i>Work for a person, institution or company</i> |
| government    | => | <i>Work for the government</i>                   |

Q: Are you a healthcare worker or a student working in the health sector? (\*)

Type: choice

A: one of the following:

|             |    |                                       |
|-------------|----|---------------------------------------|
| yes_worker  | => | <i>Yes, I am a healthcare worker</i>  |
| yes_student | => | <i>Yes, I am a healthcare student</i> |
| no          | => | <i>No</i>                             |

Q: If yes, what is your main function in the health structure? (\*)

Type: choice

A: one of the following:

|       |    |              |
|-------|----|--------------|
| nurse | => | <i>Nurse</i> |
|-------|----|--------------|

|                      |    |                                                        |
|----------------------|----|--------------------------------------------------------|
| gp                   | => | <i>Medical doctor: general practitioner</i>            |
| specialist           | => | <i>Medical doctor: resident/specialist</i>             |
| lab                  | => | <i>Laboratory staff</i>                                |
| pharmacy             | => | <i>Pharmacy staff</i>                                  |
| research_maintenance | => | <i>Research/Maintenance</i>                            |
| admin_finance        | => | <i>Administration/finance</i>                          |
| technician           | => | <i>Technician (imaging, specialized services, etc)</i> |

Visible if

Q: A:

0 - :input[name="are\_you\_a\_healthcare\_worker\_or\_a\_student\_working\_in\_the\_health\_s"] =>

1

2 - :input[name="are\_you\_a\_healthcare\_worker\_or\_a\_student\_working\_in\_the\_health\_s"] =>

Q: Have you been given any protective equipment at your place of work? (many answers possible)(\*)

Type: choice\_multiple

A: multiple answers possible:

|        |    |                              |
|--------|----|------------------------------|
| masks  | => | <i>Face masks</i>            |
| gloves | => | <i>Gloves</i>                |
| shield | => | <i>Face shield</i>           |
| boots  | => | <i>Boots</i>                 |
| apron  | => | <i>Full protective apron</i> |
| gel    | => | <i>Hand gels/sanitizers</i>  |
| none   | => | <i>None</i>                  |

Visible if

Q: A:

0 - :input[name="are\_you\_a\_healthcare\_worker\_or\_a\_student\_working\_in\_the\_health\_s"] =>

1

2 - :input[name="are\_you\_a\_healthcare\_worker\_or\_a\_student\_working\_in\_the\_health\_s"] =>

Q: What are your current working conditions? (\*)

Type: choice

A: one of the following:

|                            |    |                                                                                |
|----------------------------|----|--------------------------------------------------------------------------------|
| worker_from_home           | => | <i>Worker from home</i>                                                        |
| worker_open_space          | => | <i>Worker in an open space (market, shop, roadside, etc)</i>                   |
| worker_closed_space_alone  | => | <i>Worker in a closed indoor space alone (office, ..., etc.)</i>               |
| worker_closed_space_people | => | <i>Worker in a closed indoor space with several people (office, ..., etc.)</i> |
| not_applicable             | => | <i>Not applicable (if jobless or student)</i>                                  |

Q: How many days per week do you usually go to work? (\*)



Type: number

A: number (min: n/a / max: 7 / step: n/a)

Q: How many days did you (physically) go to work last week? (\*)

Type: number

A: number (min: n/a / max: 7 / step: n/a)

Q: Are you exclusively working from home this week? (\*)

Type: choice

A: one of the following:

|                |    |                                               |
|----------------|----|-----------------------------------------------|
| yes            | => | <i>Yes</i>                                    |
| no             | => | <i>No</i>                                     |
| not_applicable | => | <i>Not applicable (if jobless or student)</i> |

Q: Why are you not working from home? (\*)

Type: choice

A: one of the following:

|                   |    |                                                          |
|-------------------|----|----------------------------------------------------------|
| not_possible      | => | <i>It is not possible with my job</i>                    |
| not_allowed       | => | <i>It is possible, but is not allowed by my employer</i> |
| home_not_working  | => | <i>I am at home but not working</i>                      |
| no_risk_to_go_out | => | <i>I don't think there is any risk to go out</i>         |
| other             | => | <i>Other</i>                                             |

Visible if

|                                                  |               |
|--------------------------------------------------|---------------|
| Q:                                               | A:            |
| Are you exclusively working from home this week? | - value => no |

Q: What transportation means did you use to go to work? (\*)

Type: choice

A: one of the following:

|                  |    |                                                                                         |
|------------------|----|-----------------------------------------------------------------------------------------|
| public_transport | => | <i>By public transport with multiple people (taxi, bus, motorcycle, etc)</i>            |
| hired_vehicle    | => | <i>Hired a vehicle for myself and/or family members (private taxi, rented car, etc)</i> |
| own_transport    | => | <i>personal vehicle (Car, motorcycle, etc)</i>                                          |
| walked           | => | <i>Walked to work</i>                                                                   |

Visible if

|                                                  |               |
|--------------------------------------------------|---------------|
| Q:                                               | A:            |
| Are you exclusively working from home this week? | - value => no |

## Personal preventive measures for coronavirus

Q: I follow the social 1.5-2m meters distance rule (\*)

Type: choice

A: one of the following:

|     |    |     |
|-----|----|-----|
| Yes | => | Yes |
| No  | => | No  |

Q: I wear a face mask when going outside (\*)

Type: choice

A: one of the following:

|     |    |                                  |
|-----|----|----------------------------------|
| yes | => | Yes                              |
| no  | => | No                               |
| na  | => | Not applicable (I do not go out) |

Q: If yes, when/where do you wear a face mask? (many answers possible) (\*)

Type: choice\_multiple

A: multiple answers possible:

|               |    |                         |
|---------------|----|-------------------------|
| home          | => | At home                 |
| work          | => | At work                 |
| sometimes_out | => | Sometimes when I go out |
| always_out    | => | Everytime I go out      |

Visible if

|                                       |                |
|---------------------------------------|----------------|
| Q:                                    | A:             |
| I wear a face mask when going outside | - value => yes |

Q: If no, what is (are) the reason(s) for not using face masks? (many answers possible) (\*)

Type: choice\_multiple

A: multiple answers possible:

|              |    |                                     |
|--------------|----|-------------------------------------|
| no_mask      | => | I do not have a mask                |
| no_money     | => | I don't have money to buy masks     |
| where_to_get | => | I don't know where to get a mask    |
| not_needed   | => | I don't think that masks are needed |

Visible if

|                                       |               |
|---------------------------------------|---------------|
| Q:                                    | A:            |
| I wear a face mask when going outside | - value => no |

**Q: When I cough or sneeze, I do so in my elbow and/or I cover my mouth with a tissue paper(\*)**

Type: choice

A: one of the following:

|     |    |            |
|-----|----|------------|
| Yes | => | <i>Yes</i> |
| No  | => | <i>No</i>  |

**Q: When I cough or sneeze, I usually wash/desinfect my hands immediately afterwards (\*)**

Type: choice

A: one of the following:

|     |    |            |
|-----|----|------------|
| Yes | => | <i>Yes</i> |
| No  | => | <i>No</i>  |

**Q: I measure my body temperature at least twice a week (\*)**

Type: choice

A: one of the following:

|     |    |            |
|-----|----|------------|
| Yes | => | <i>Yes</i> |
| No  | => | <i>No</i>  |

**Q: I wash my hands using soap and water regularly during the day (\*)**

Type: choice

A: one of the following:

|     |    |            |
|-----|----|------------|
| Yes | => | <i>Yes</i> |
| No  | => | <i>No</i>  |

**Q: I use a hand sanitizer regularly during the day (\*)**

Type: choice

A: one of the following:

|     |    |            |
|-----|----|------------|
| Yes | => | <i>Yes</i> |
| No  | => | <i>No</i>  |

**Q: What constraints to hand washing/use of hand sanitizers do you face?**

Type:  
text

A: text input

Visible if

| Q:                                                            | A:               |
|---------------------------------------------------------------|------------------|
| I wash my hands using soap and water regularly during the day | - value =><br>No |
| I use a hand sanitizer regularly during the day               | - value =><br>No |

Q: I avoid touching my face (eyes, nose and mouth) (\*)

Type: choice

A: one of the following:

|     |    |     |
|-----|----|-----|
| Yes | => | Yes |
| No  | => | No  |

Q: I disinfect my phone whenever I return home (\*)

Type: choice

A: one of the following:

|     |    |                |
|-----|----|----------------|
| yes | => | Yes            |
| no  | => | No             |
| na  | => | Not applicable |

Q: I stay home when I feel flu-like symptoms (\*)

Type: choice

A: one of the following:

|     |    |     |
|-----|----|-----|
| Yes | => | Yes |
| No  | => | No  |

Q: On a scale of 1 to 5, how difficult is it for you personally to follow the protective measure of staying home as much as possible? (\*)

Type:  
choice\_scale

A: 1 = not difficult at all; 5 = extremely difficult

|   |    |   |
|---|----|---|
| 1 | => | 1 |
| 2 | => | 2 |
| 3 | => | 3 |
| 4 | => | 4 |
| 5 | => | 5 |

## Community preventive measures for coronavirus

Q: Were you in a meeting or gathering with with 50 persons or more during the last 7 days? (\*)

Type: choice

A: one of the following:

|     |    |            |
|-----|----|------------|
| Yes | => | <i>Yes</i> |
| No  | => | <i>No</i>  |

**Q: What was the nature of the gathering? (multiple answers possible) (\*)**

Type: choice\_multiple

A: multiple answers possible:

|            |    |                            |
|------------|----|----------------------------|
| restaurant | => | <i>Restaurant</i>          |
| bar        | => | <i>Bar</i>                 |
| club       | => | <i>Club</i>                |
| party      | => | <i>Party</i>               |
| funeral    | => | <i>Funeral</i>             |
| religious  | => | <i>Religious gathering</i> |
| family     | => | <i>Family gathering</i>    |
| sport      | => | <i>Sports event</i>        |
| other      | => | <i>Other</i>               |

Visible if

Q:

Were you in a meeting or gathering with with 50 persons or more during the last 7 days?

A:

- value =>  
Yes

**Q: Were you in a car with 4 or more other persons during the last 7 days? (\*)**

Type: choice

A: one of the following:

|     |    |            |
|-----|----|------------|
| Yes | => | <i>Yes</i> |
| No  | => | <i>No</i>  |

**Q: Were you in a public gym in the past 7 days ? (\*)**

Type: choice

A: one of the following:

|     |    |            |
|-----|----|------------|
| Yes | => | <i>Yes</i> |
| No  | => | <i>No</i>  |

**Q: Did you go to a barber/hairdresser, beauty parlour, massages, spa, or nail studio in the past 7 days ? (\*)**

Type: choice

A: one of the following:

|     |    |            |
|-----|----|------------|
| Yes | => | <i>Yes</i> |
| No  | => | <i>No</i>  |

**Q: Did you go to a market in the past 7 days ? (\*)**

Type: choice

A: one of the following:

|     |    |     |
|-----|----|-----|
| Yes | => | Yes |
| No  | => | No  |

Q: Did you travel in the past 7 days? (\*)

Type: choice

A: one of the following:

|                     |    |                                                  |
|---------------------|----|--------------------------------------------------|
| yes_other_regions   | => | Yes, I travelled to other regions of the country |
| yes_outside_country | => | Yes, I travelled outside of the country          |
| no_travel           | => | No travel                                        |

Q: During the last week, how worried or afraid were you about the health of your loved ones? (\*)

Type:  
choice\_scale

A: 1 = not worried to 5 = extremely worried

|   |    |   |
|---|----|---|
| 1 | => | 1 |
| 2 | => | 2 |
| 3 | => | 3 |
| 4 | => | 4 |
| 5 | => | 5 |

Q: On a scale of 1 to 10, can you indicate the extent to which people in your environment have practically adapted their behavior to the government recommendations? (\*)

Type:  
choice\_scale

A: 1 = no adaptations, 10 = very strong adaptation

|    |    |    |
|----|----|----|
| 1  | => | 1  |
| 2  | => | 2  |
| 3  | => | 3  |
| 4  | => | 4  |
| 5  | => | 5  |
| 6  | => | 6  |
| 7  | => | 7  |
| 8  | => | 8  |
| 9  | => | 9  |
| 10 | => | 10 |

## Questions related to your personal health

Q: Have you been eating more healthy food such as fruits and vegetables since the coronavirus epidemic started? (\*)

Type: choice

A: one of the following:

|     |    |     |
|-----|----|-----|
| Yes | => | Yes |
|-----|----|-----|

|    |    |    |
|----|----|----|
| No | => | No |
|----|----|----|

Q: Have you been taking more vitamin tablets since the coronavirus epidemic started? (\*)

Type: choice

A: one of the following:

|     |    |     |
|-----|----|-----|
| Yes | => | Yes |
| No  | => | No  |

Q: Did you experience any of the following flu-like symptoms during the last 14 days? (multiple options possible)(\*)

Type: choice\_multiple

A: multiple answers possible:

|                  |    |                                   |
|------------------|----|-----------------------------------|
| fever            | => | <i>Fever</i>                      |
| headaches        | => | <i>Headaches</i>                  |
| sore_throat      | => | <i>Sore throat</i>                |
| loss_taste       | => | <i>Loss of taste</i>              |
| loss_smell       | => | <i>Loss of smell</i>              |
| stuffy_nose      | => | <i>Stuffy and/or running nose</i> |
| dry_cough        | => | <i>Dry cough</i>                  |
| productive_cough | => | <i>Productive cough</i>           |
| shortness_breath | => | <i>Shortness of breath</i>        |
| muscle_pain      | => | <i>Muscle or body pains</i>       |
| weakness         | => | <i>General weakness</i>           |
| nausea           | => | <i>Nausea</i>                     |
| diarrhea         | => | <i>Diarrhea</i>                   |
| none             | => | <i>None of the above</i>          |

Q: For how many days did you have flu-like symptoms? (\*)

Type: number

A: number (min: 1 / max: 50 / step: n/a)

Visible if

|                                                                                                        |    |
|--------------------------------------------------------------------------------------------------------|----|
| Q:                                                                                                     | A: |
| :input[name="if_yes_which_symptoms_did_you_experience_multiple_options_possib[none]"] - unchecked => 1 |    |

Q: Have any of your housemates had flu-like symptoms in the last 14 days? (\*)

Type: choice

A: one of the following:

|     |    |     |
|-----|----|-----|
| yes | => | Yes |
| no  | => | No  |

|             |    |                    |
|-------------|----|--------------------|
| do_not_know | => | <i>Do not know</i> |
|-------------|----|--------------------|

Q: Have you been tested for the coronavirus? (\*)

Type: choice

A: one of the following:

|     |    |            |
|-----|----|------------|
| yes | => | <i>Yes</i> |
| no  | => | <i>No</i>  |

Q: If yes, what was the result of the test? (\*)

Type: choice

A: one of the following:

|             |    |                        |
|-------------|----|------------------------|
| positive    | => | <i>Positive</i>        |
| negative    | => | <i>Negative</i>        |
| do_not_know | => | <i>Do not know yet</i> |

Visible if

|                                           |                |
|-------------------------------------------|----------------|
| Q:                                        | A:             |
| Have you been tested for the coronavirus? | - value => yes |

Q: When was your coronavirus test done? (\*)

Type: choice

A: one of the following:

|                     |    |                                        |
|---------------------|----|----------------------------------------|
| two_weeks           | => | <i>During the past two weeks</i>       |
| one_month           | => | <i>Between two weeks and one month</i> |
| more_than_one_month | => | <i>More than one month ago</i>         |

Visible if

|                                           |                |
|-------------------------------------------|----------------|
| Q:                                        | A:             |
| Have you been tested for the coronavirus? | - value => yes |

Q: Do you smoke? (\*)

Type: choice

A: one of the following:

|     |    |            |
|-----|----|------------|
| Yes | => | <i>Yes</i> |
| No  | => | <i>No</i>  |

Q: Do you have any of the following chronic/underlying disease? (many answers possible) (\*)

Type: choice\_multiple



A: multiple answers possible:

|               |    |                          |
|---------------|----|--------------------------|
| heart_disease | => | <i>Heart disease</i>     |
| hypertension  | => | <i>Hypertension</i>      |
| diabetes      | => | <i>Diabetes</i>          |
| cancer        | => | <i>Cancer</i>            |
| hiv           | => | <i>HIV</i>               |
| tb            | => | <i>Tuberculosis</i>      |
| asthma        | => | <i>Asthma</i>            |
| other         | => | <i>Other</i>             |
| none          | => | <i>None of the above</i> |

Q: If you have an underlying disease did you experience difficulties to obtain your medication since the COVID outbreak started? (\*)

Type: choice

A: one of the following:

|     |    |            |
|-----|----|------------|
| Yes | => | <i>Yes</i> |
| No  | => | <i>No</i>  |

Visible if

|                                                                                                       |    |
|-------------------------------------------------------------------------------------------------------|----|
| Q:                                                                                                    | A: |
| :input[name="do_you_have_any_of_the_following_underlying_disease_many_answers[none]" - unchecked => 1 |    |

Q: In your opinion, is the coronavirus lockdown necessary in Congo? (\*)

Type: choice

A: one of the following:

|     |    |            |
|-----|----|------------|
| yes | => | <i>Yes</i> |
| no  | => | <i>No</i>  |

Q: I fully understand what this study is about, and I freely consent to participate. All the information I provide can be used by researchers to better understand coronavirus disease in Congo. (\*)

Type: checkbox

A: checkbox
